# Supplementary material for: Fusogenic Hybrid Extracellular Vesicles with PD-1 Membrane Proteins for the Cytosolic Delivery of Cargos
Source: MDPI journal article supplement (doi:10.3390/cancers14112635), 2022-05-26
Supplement: s1 [file s1]

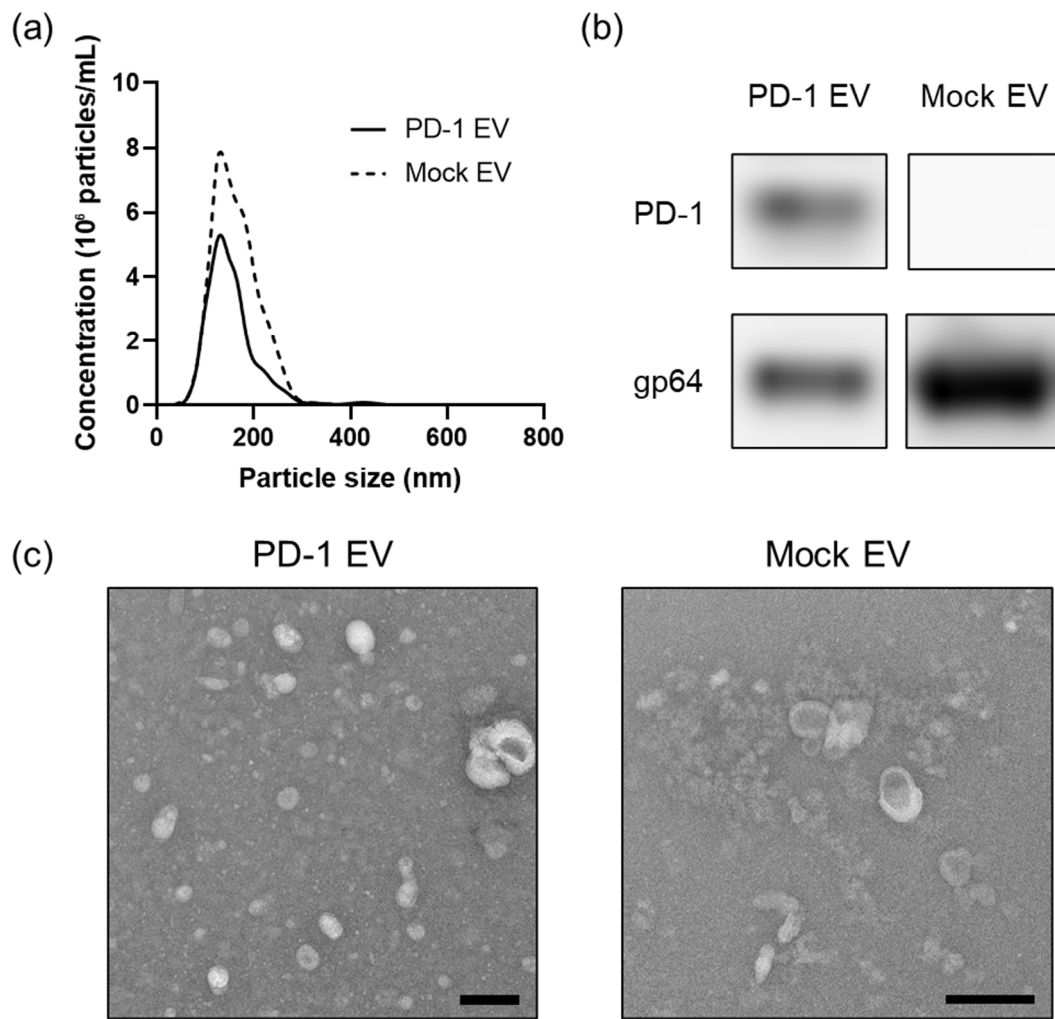

**Figure S1.** (a) Size distributions of PD-1 EVs and mock EVs as determined by NTA. (b) Western blot analysis of PD-1 EVs and mock EVs using antibodies against PD-1 and gp64. (c) Morphologies of PD-1 EVs and mock EVs observed by TEM. Scale bars, 200 nm.

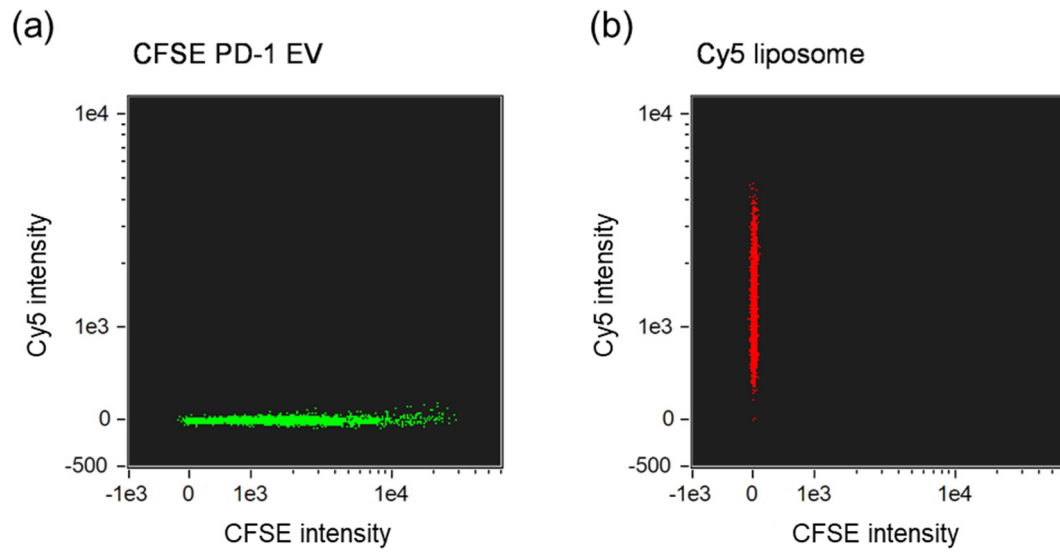

**Figure S2.** Single-particle fluorescence analysis of PD-1 EVs and liposomes before membrane fusion. Dot plots of 5  $\mu\text{g/mL}$  CFSE-labeled PD-1 EVs (a) and 1  $\mu\text{M}$  Cy5-labeled liposomes (b) at pH 7.5 as determined by IFC.

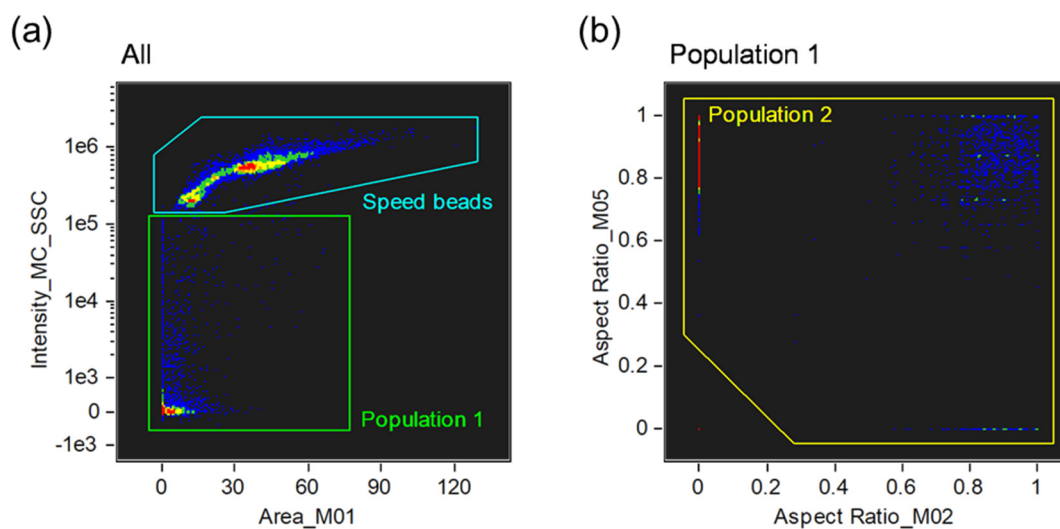

**Figure S3.** Gating process for detection of fluorescence nanoparticles by IFC. Plots were obtained in acidic conditions; the gating process was similar to that for neutral conditions. **(a)** Removal of speed beads using channels 1 (brightfield) and 6 (side scatter). **(b)** Removal of fluorescent noise for channels 2 and 5. Finally, 10,000 particles were acquired and analyzed in Population 2.

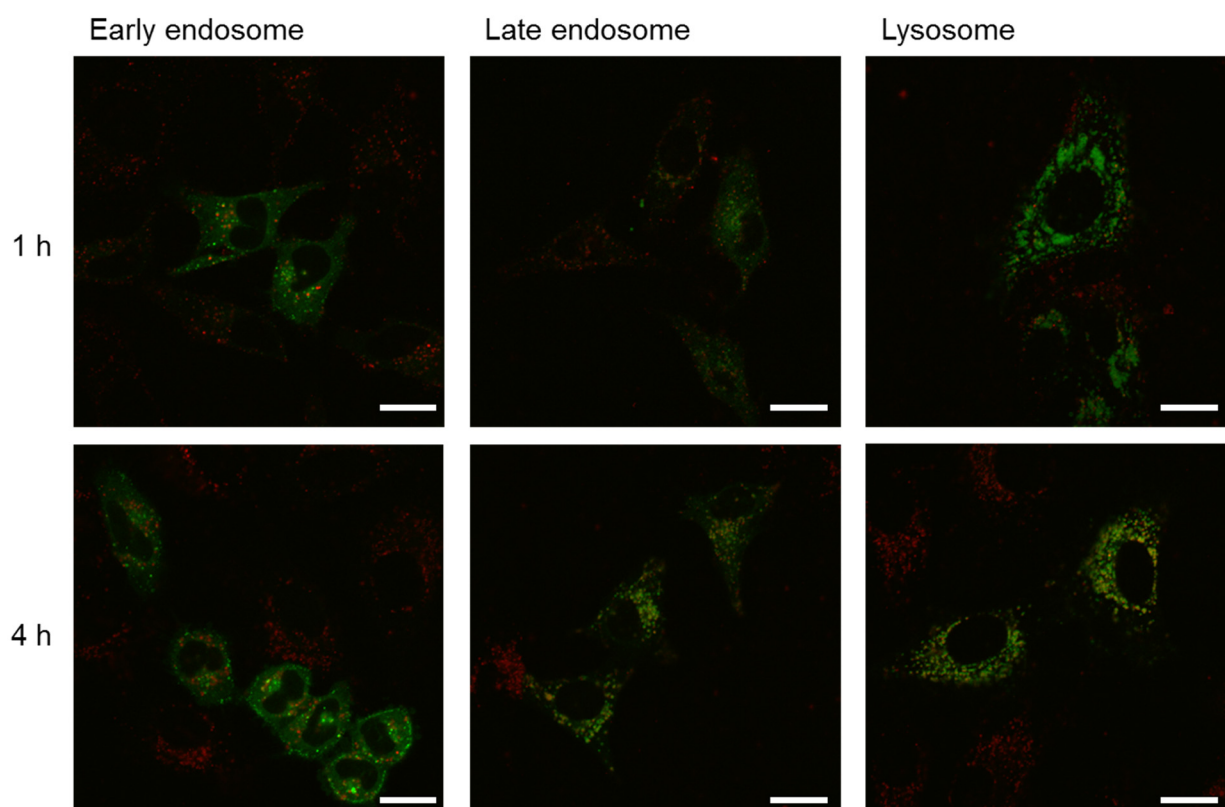

**Figure S4.** HeLa cells that had been pre-stained with GFP using CellLight™ reagents to detect early endosomes, late endosomes, and lysosomes were incubated with 12.5  $\mu$ M PD-1 hybrid EVs for 1 or 4 h and observed with a CLSM. Scale bars, 20  $\mu$ m.

- ①: PD-1 EV (Figure S1b)
- ②: PD-1 hybrid EV (Figure 2b)
- ③: Mock EV (Figure S1b)
- ④: Mock hybrid EV (Figure 2b)

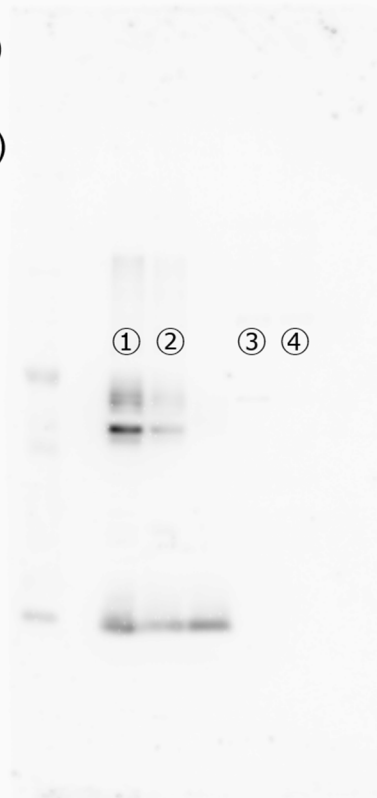

- ①: PD-1 EV (Figure S1b)
- ②: PD-1 hybrid EV (Figure 2b)
- ③: Mock EV (Figure S1b)
- ④: Mock hybrid EV (Figure 2b)

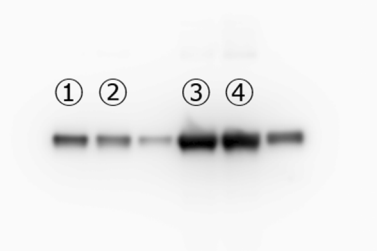

**Figure S5.** Full Western Blots for Figure 2b and S1b.
